# Supplementary material
Source: PubMed Central journal article supplement (PMC6170679)

**Table S1: 62 Cytokines**

|                                                                                          |
|------------------------------------------------------------------------------------------|
| Axl, BLC, CD 30L, CD 30T, CD40, CRG-2, CTACK, CXCL16, Eotaxin, Eotaxin-2,                |
| Fas Ligand, Fractalkine, GCSF, GM-CSF, IFN $\gamma$ , IGFBP-3, IGFBP-5, IGFBP-6, IL-     |
| 1a, IL-1b, IL-2, IL-3, IL-3 Rb, IL-4, IL-5, IL-6, IL-9, IL-10, IL-12 p40/p70, IL-12 p70, |
| IL-13, IL-17, KC, Leptin R, Leptin, LIX, L-selectin, Lymphotactin, MCP-1, MCP-5,         |
| M-CSF, MIG, MIP-1a, MIP-1 $\gamma$ , MIP-2, MIP-3b, MIP-3a, PF-4, P-selectin, RANTES,    |
| SCF, SDF-1a, TARC, TCA-3, TECK, TIMP-1, TNF $\alpha$ , sTNF R1, sTNF RII, TPO,           |
| VCAM-1, VEGF                                                                             |

Figure S1

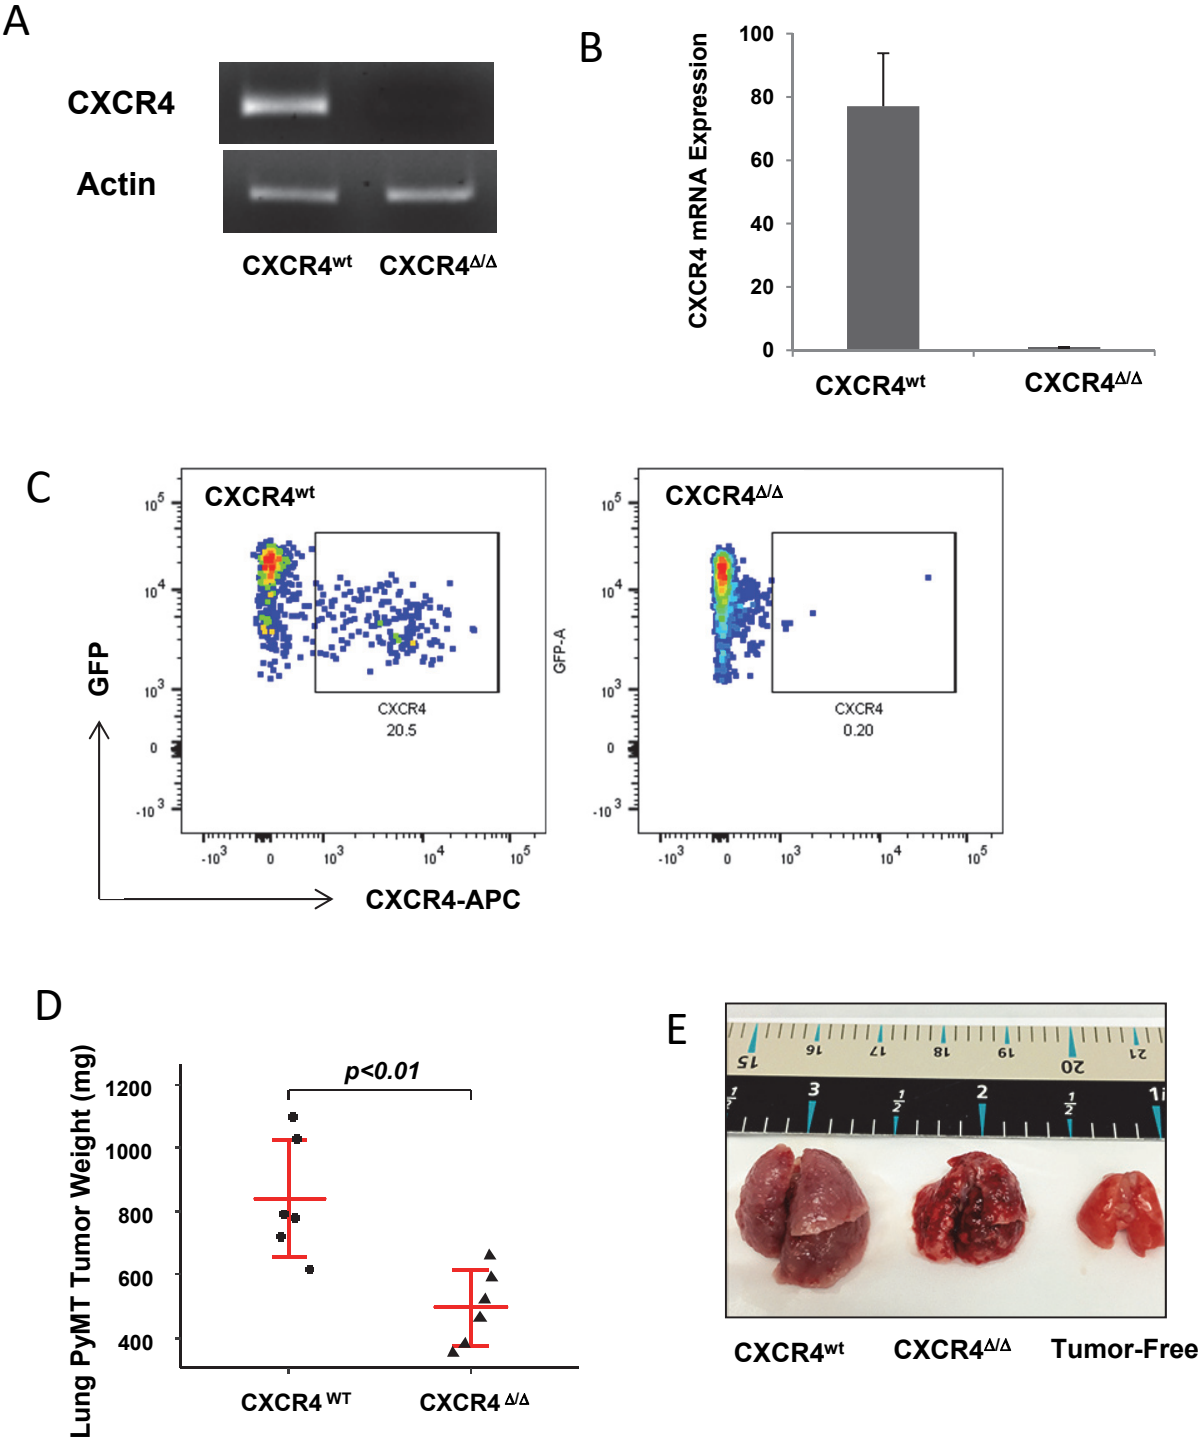

Figure S1

F

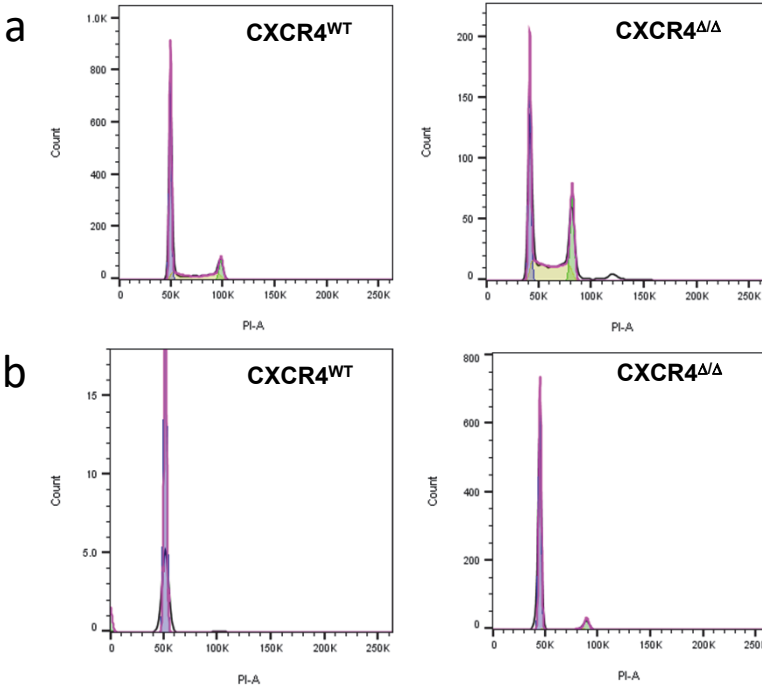

a2

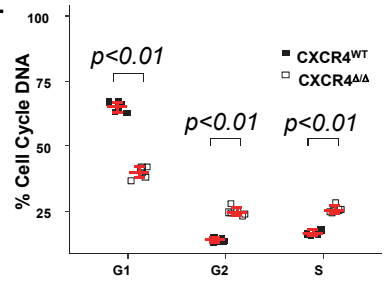

b2

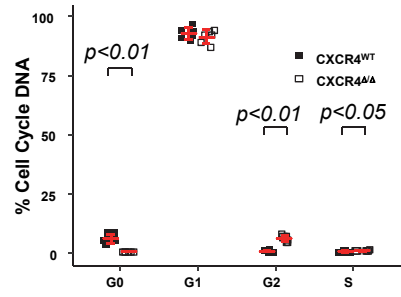

G

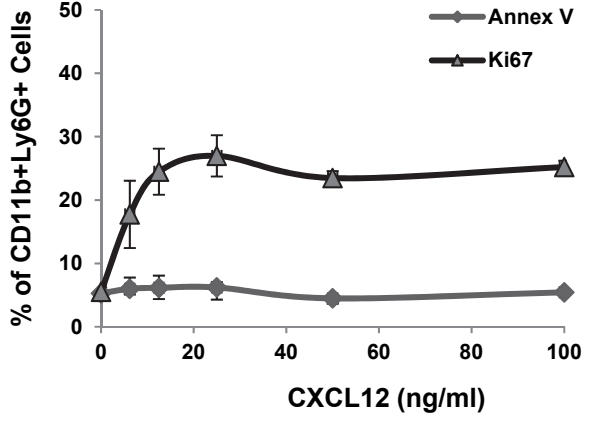

H

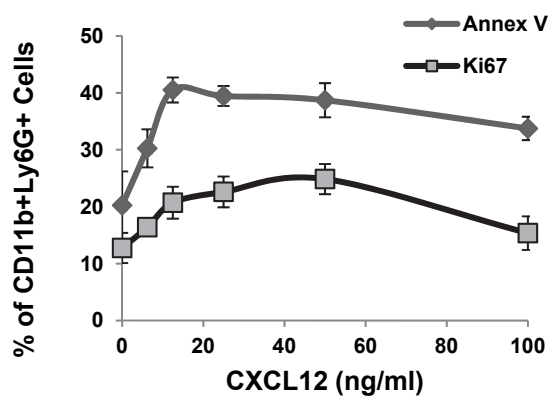

Figure S1

I

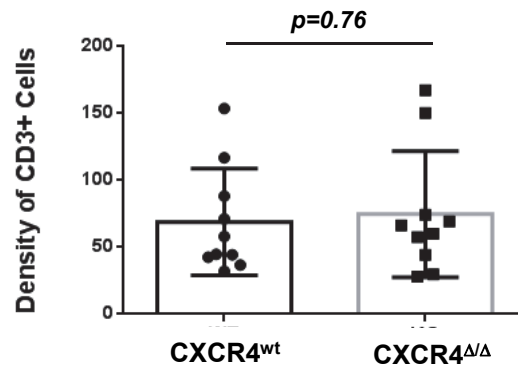

J

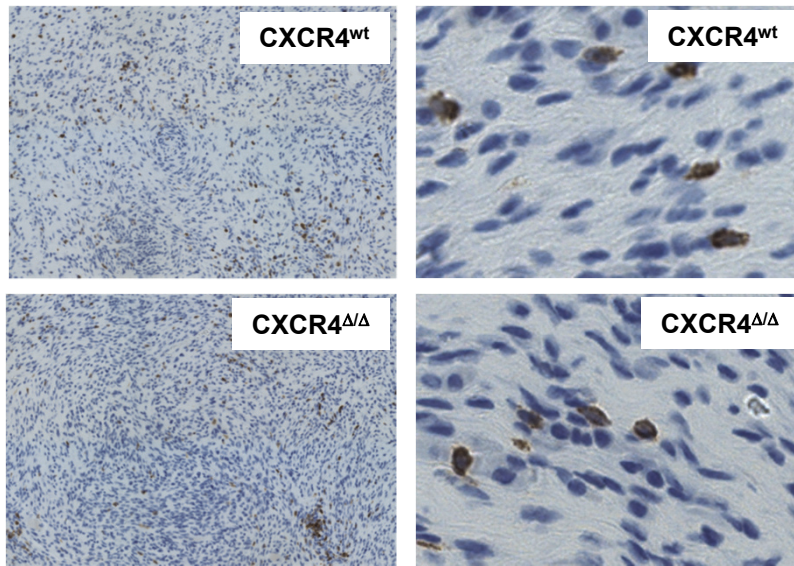

Figure S2

A

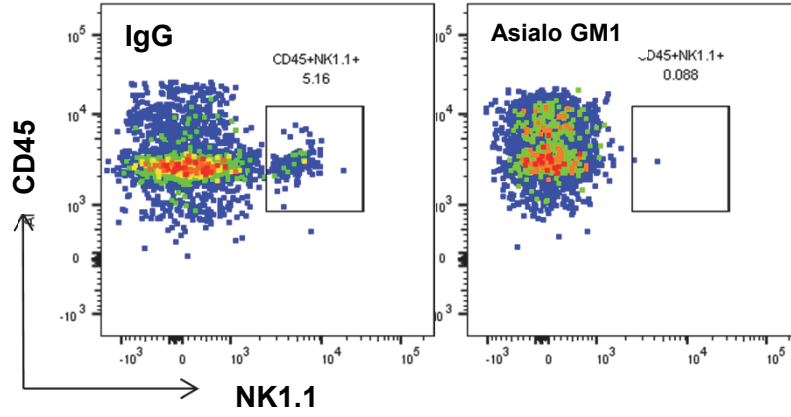

B

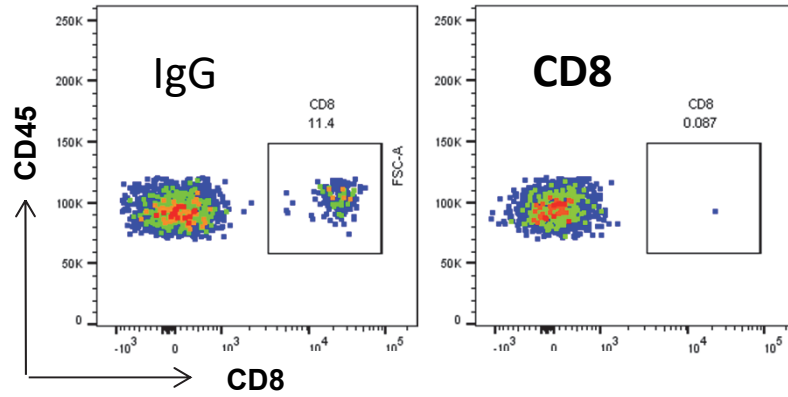

C

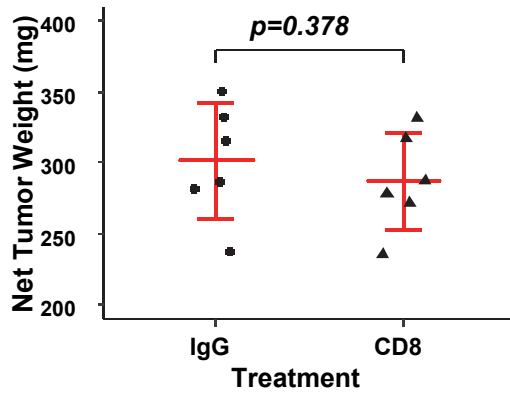

D

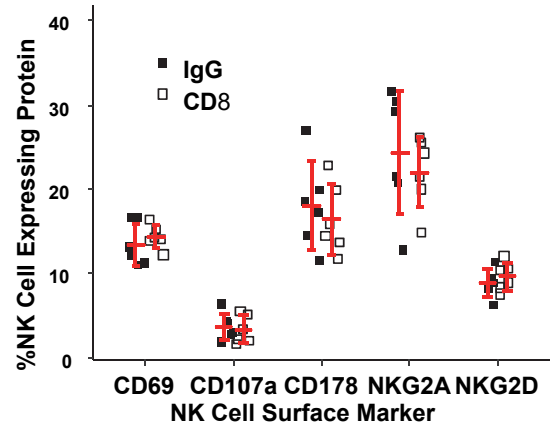

Figure S3

A

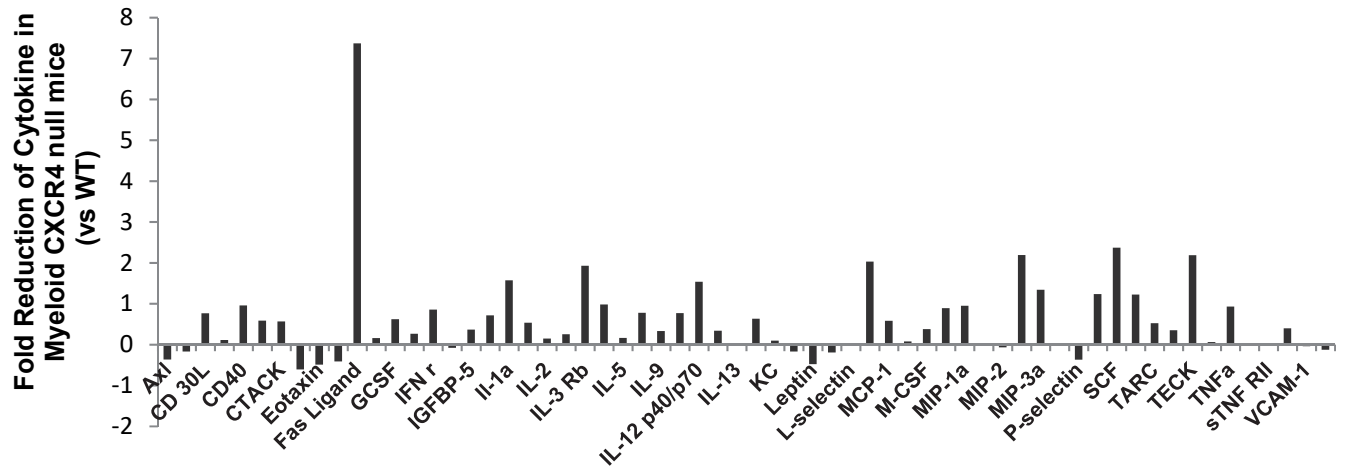

B

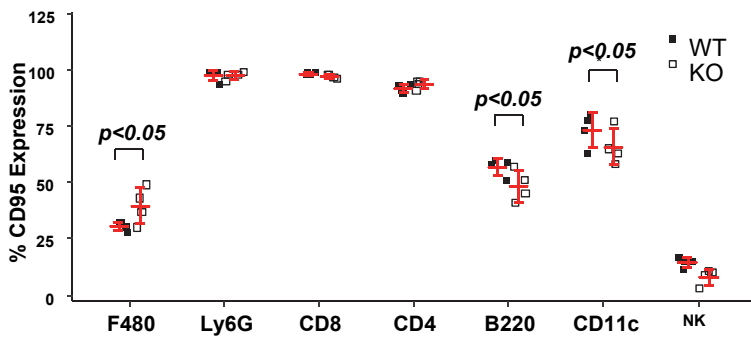

C

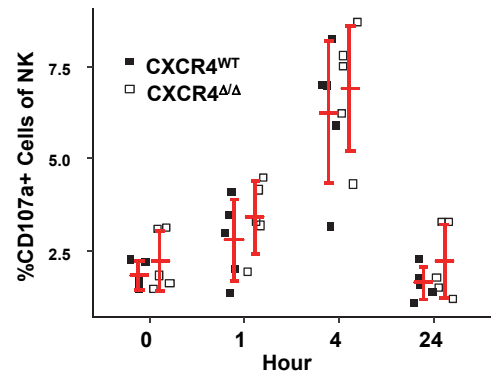

D

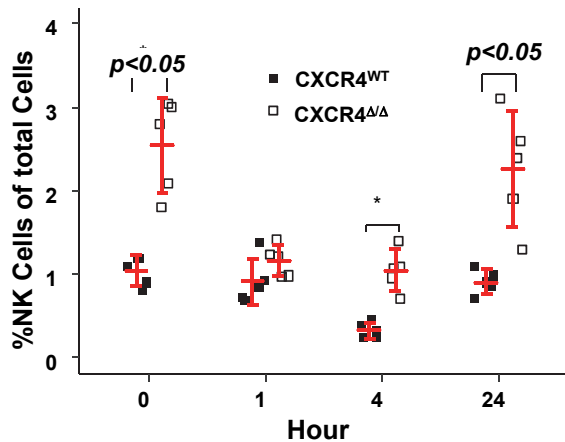

E

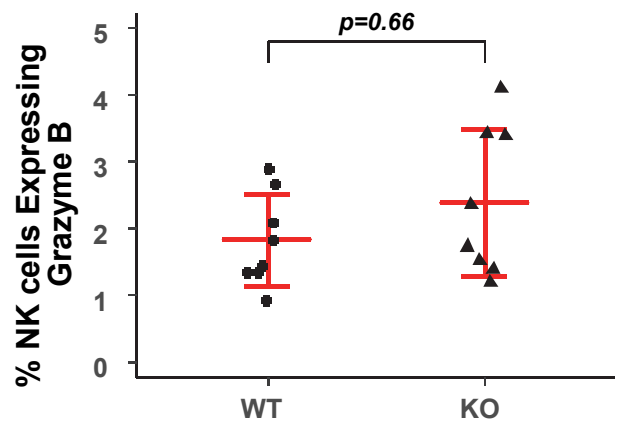

Figure S4

A

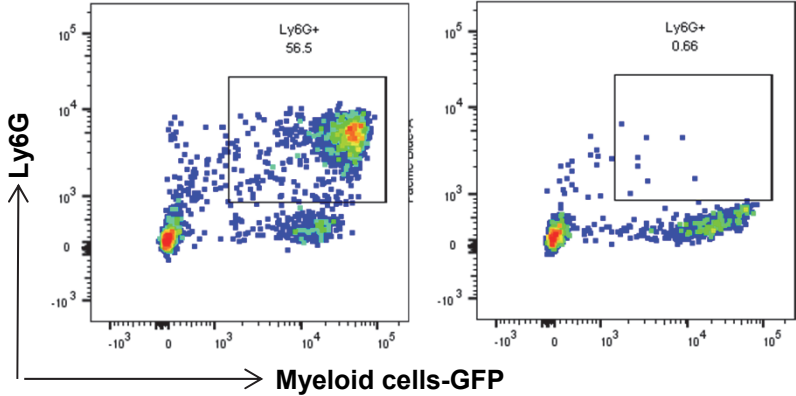

B

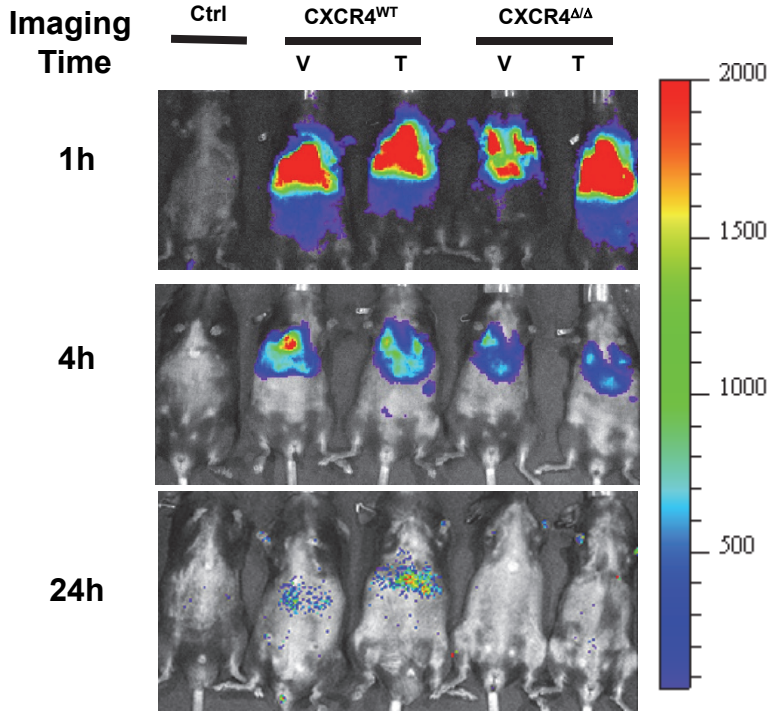

C

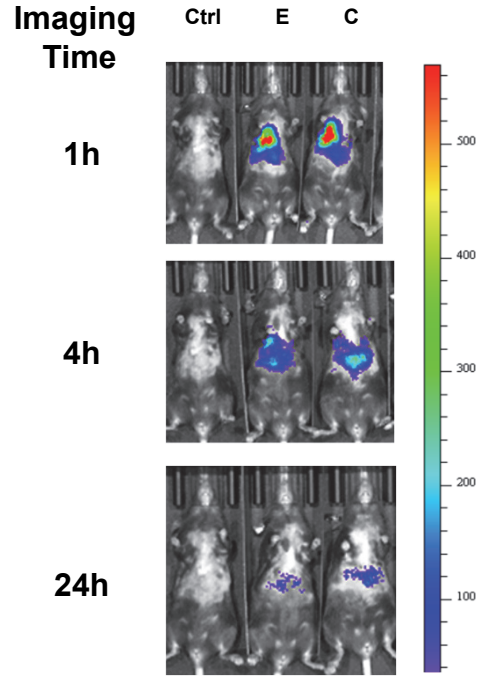

Figure S5

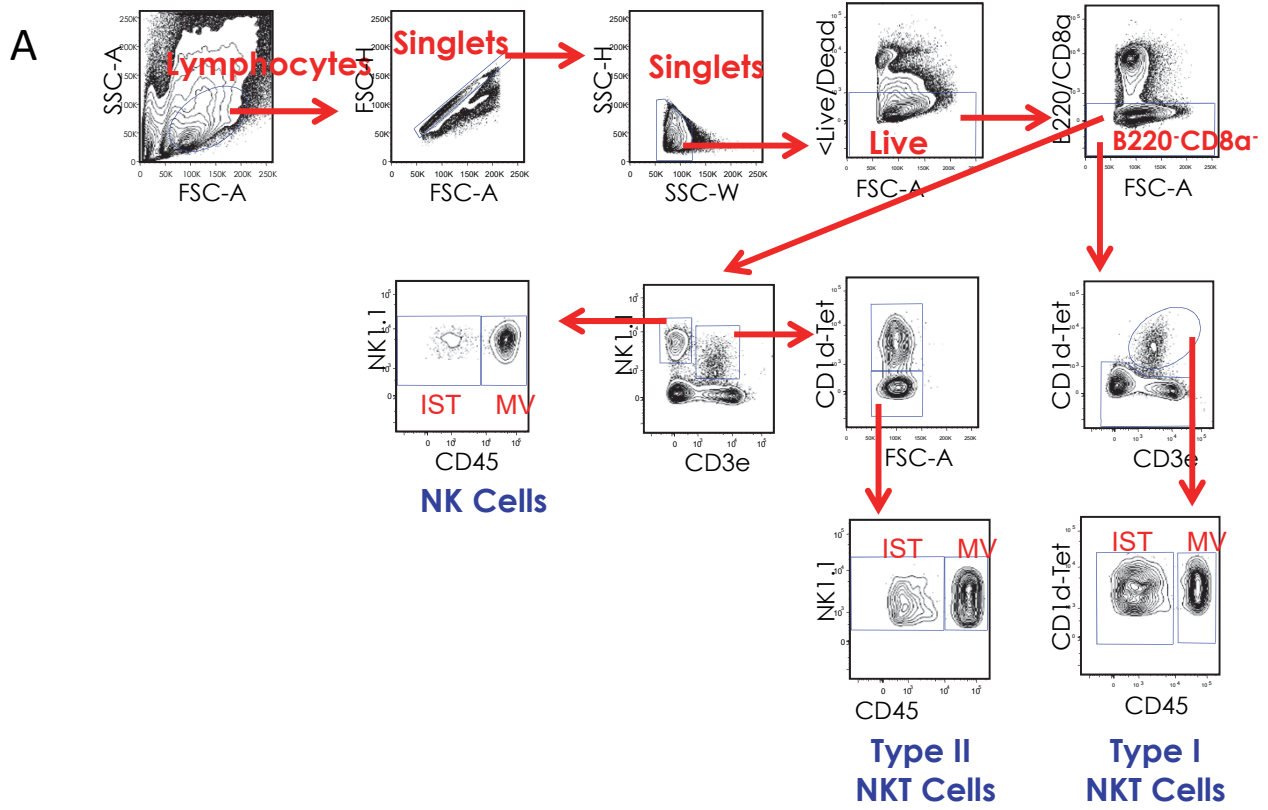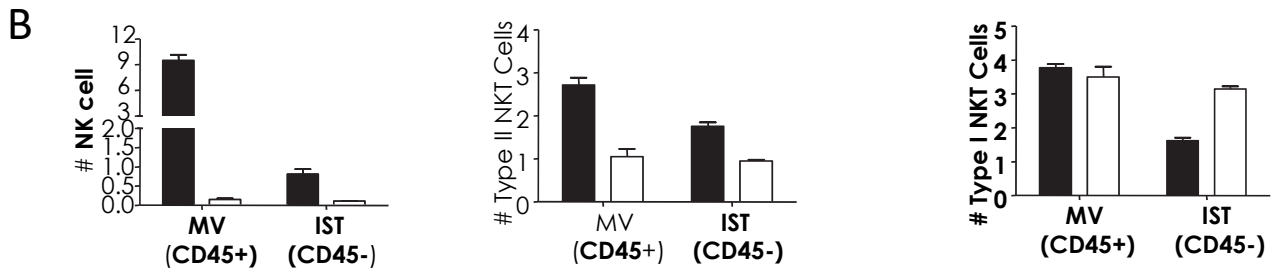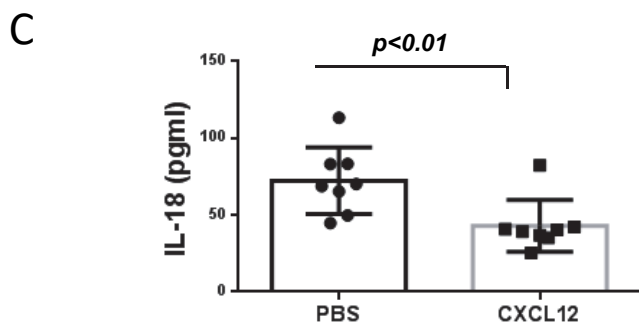



Figure S6

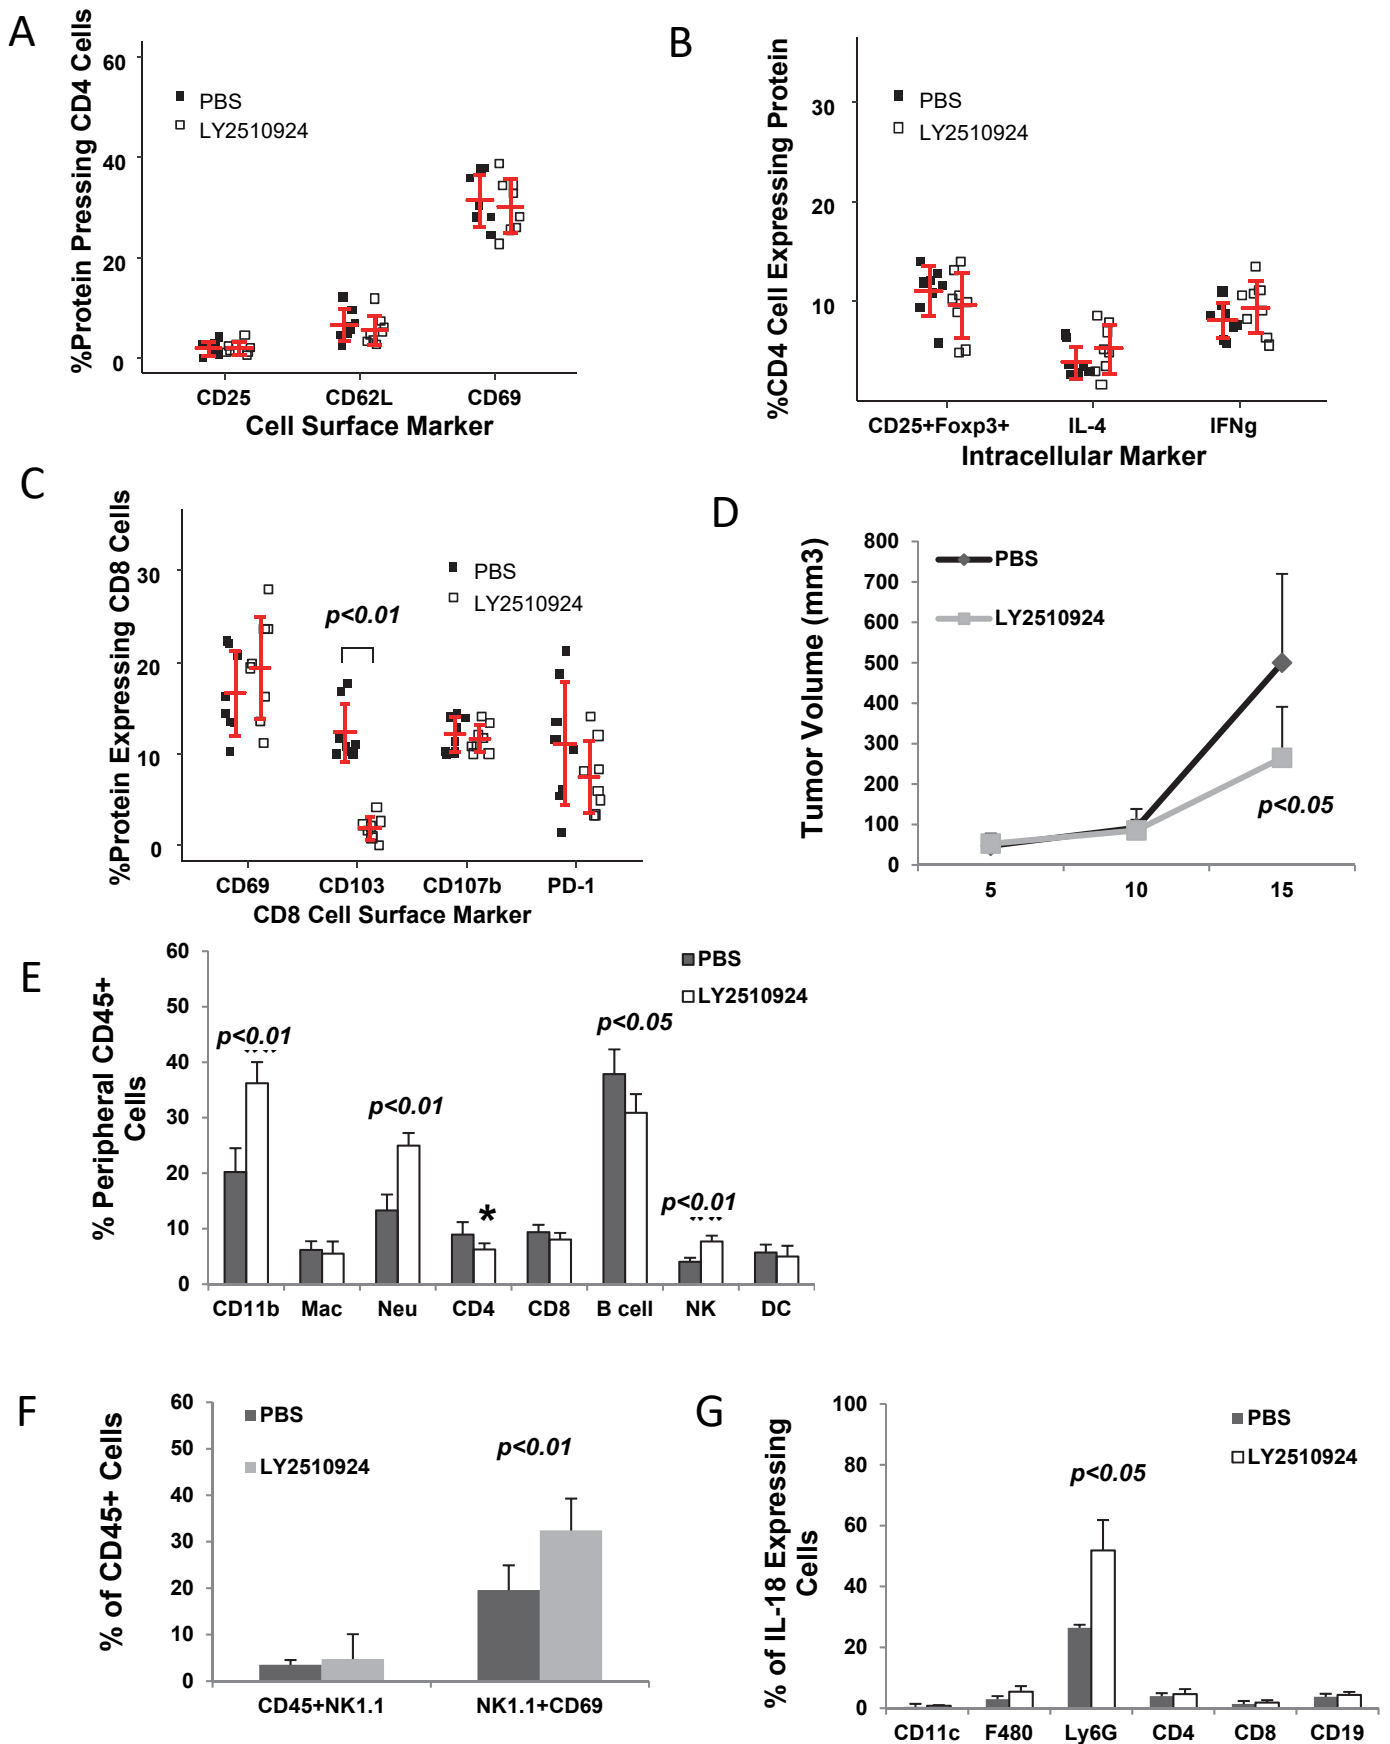

Figure S7

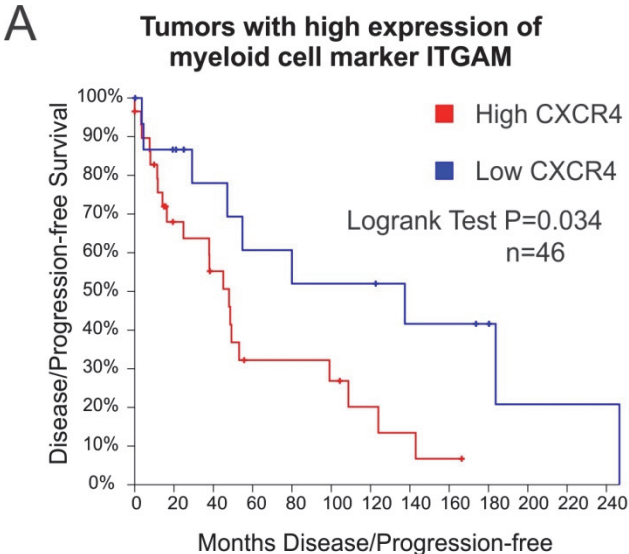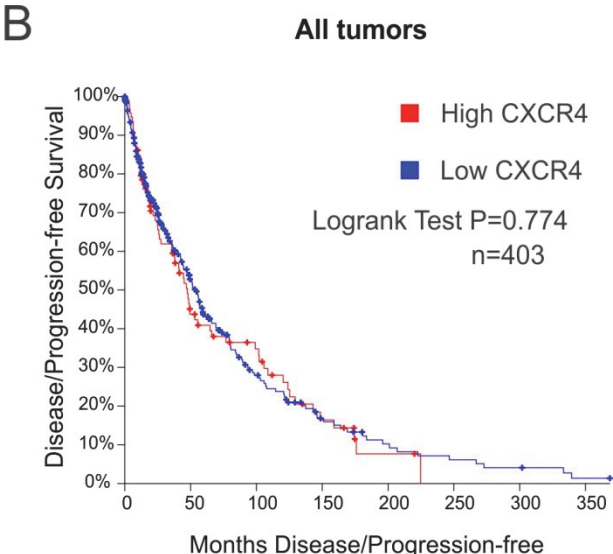

Supplement: NIHMS1503966-supplement-2.pdf [file NIHMS1503966-supplement-2.pdf]
